# Kaposi's Sarcoma Associated Herpesvirus Encoded Viral FLICE Inhibitory Protein K13 Activates NF- $\kappa$ B Pathway Independent of TRAF6, TAK1 and LUBAC

Hittu Matta, Ramakrishnan Gopalakrishnan, Ciaren Graham, Bhairavi Tolani, Akshat Khanna, Han Yi, Yulan Suo, Preet M. Chaudhary\*

Jane Anne Nohl Division of Hematology and Center for the Study of Blood Diseases, University of Southern California Keck School of Medicine, Los Angeles, California, United States of America

## Abstract

**Background:** Kaposi's sarcoma associated herpesvirus encoded viral FLICE inhibitory protein (vFLIP) K13 activates the NF- $\kappa$ B pathway by binding to the NEMO/IKK $\gamma$  subunit of the I $\kappa$ B kinase (IKK) complex. However, it has remained enigmatic how K13-NEMO interaction results in the activation of the IKK complex. Recent studies have implicated TRAF6, TAK1 and linear ubiquitin chains assembled by a linear ubiquitin chain assembly complex (LUBAC) consisting of HOIL-1, HOIP and SHARPIN in IKK activation by proinflammatory cytokines.

**Methodology/Principal Findings:** Here we demonstrate that K13-induced NF- $\kappa$ B DNA binding and transcriptional activities are not impaired in cells derived from mice with targeted disruption of *TRAF6*, *TAK1* and *HOIL-1* genes and in cells derived from mice with chronic proliferative dermatitis (cpdm), which have mutation in the *Sharpin* gene (*Sharpin*<sup>cpdm/cpdm</sup>). Furthermore, reconstitution of NEMO-deficient murine embryonic fibroblast cells with NEMO mutants that are incapable of binding to linear ubiquitin chains supported K13-induced NF- $\kappa$ B activity. K13-induced NF- $\kappa$ B activity was not blocked by CYLD, a deubiquitylating enzyme that can cleave linear and Lys63-linked ubiquitin chains. On the other hand, NEMO was required for interaction of K13 with IKK1/IKK $\alpha$  and IKK2/IKK $\beta$ , which resulted in their activation by "T Loop" phosphorylation.

**Conclusions/Significance:** Our results demonstrate that K13 activates the NF- $\kappa$ B pathway by binding to NEMO which results in the recruitment of IKK1/IKK $\alpha$  and IKK2/IKK $\beta$  and their subsequent activation by phosphorylation. Thus, K13 activates NF- $\kappa$ B via a mechanism distinct from that utilized by inflammatory cytokines. These results have important implications for the development of therapeutic agents targeting K13-induced NF- $\kappa$ B for the treatment of KSHV-associated malignancies.

**Citation:** Matta H, Gopalakrishnan R, Graham C, Tolani B, Khanna A, et al. (2012) Kaposi's Sarcoma Associated Herpesvirus Encoded Viral FLICE Inhibitory Protein K13 Activates NF- $\kappa$ B Pathway Independent of TRAF6, TAK1 and LUBAC. PLoS ONE 7(5): e36601. doi:10.1371/journal.pone.0036601

**Editor:** J. Pedro Simas, Lisbon University, Portugal

**Received:** November 30, 2011; **Accepted:** April 11, 2012; **Published:** May 8, 2012

**Copyright:** © 2012 Matta et al. This is an open-access article distributed under the terms of the Creative Commons Attribution License, which permits unrestricted use, distribution, and reproduction in any medium, provided the original author and source are credited.

**Funding:** This work was supported by National Institutes of Health (DE019811 and CA139119) and the Leukemia & Lymphoma Society. The funders had no role in study design, data collection and analysis, decision to publish, or preparation of the manuscript.

**Competing Interests:** The authors have declared that no competing interests exist.

\* E-mail: preet.chaudhary@med.usc.edu

## Introduction

Transcription factors of the nuclear factor- $\kappa$  B (NF- $\kappa$ B) family regulate expression of hundreds of genes involved in the inflammatory and immune response [1,2,3]. The classical NF- $\kappa$ B complex is a heterodimer of the p65/RelA and p50 subunits and is found in most cells in association with a family of inhibitory proteins, called I $\kappa$ Bs [4,5]. The I $\kappa$ B proteins are identified by the presence of multiple ankyrin repeats and retain NF- $\kappa$ B in the cytoplasm through the masking of the nuclear localization signal of p65. Most of the diverse signaling pathways that activate NF- $\kappa$ B converge on a multi-subunit I $\kappa$ B kinase (IKK) complex that contains two catalytic subunits, IKK1/IKK $\alpha$  and IKK2/IKK $\beta$ , and a regulatory subunit, NEMO/IKK $\gamma$  [5,6]. The IKK complex induces phosphorylation of I $\kappa$ B proteins that leads to their ubiquitination and proteasomal-mediated degradation, allowing the NF- $\kappa$ B subunits to enter the nucleus and turn on the expression of their target genes [4].

A kinase complex composed of TAK1 and its associated subunits TAB1, TAB2 and TAB3 has been reported to act as the upstream kinase that activates the IKK complex by targeting two serine residues located in the conserved "T loop" region of the kinase domains of IKK1/IKK $\alpha$  and IKK2/IKK $\beta$  [7,8]. Recently, various members of the E3 ligase family have recently been implicated in NF- $\kappa$ B activation by participating in ubiquitination processes not linked to protein degradation [8]. For example, one of the best characterized pathways that results in NF- $\kappa$ B activation is the Tumor Necrosis Factor Receptor 1 (TNFR1) signaling pathway, which is activated by TNF $\alpha$  [9,10]. Binding of TNF $\alpha$  to TNFR1, results in the recruitment of several adaptor proteins to the cytosolic domain of the receptor, including the adaptor protein TRADD, E3 ligase TRAF2 and cIAPs and kinases RIP, TAK1 and IKKs [10,11,12,13,14,15,16]. These macromolecular complex results in TRAF2 and cIAP1-mediated Lys63-linked polyubiquitination of RIP, which then recruits the TAK1 complex through specific

affinity of TAB2 and TAB3 for Lys63-linked chains [7,8,17]. Recently, another novel ubiquitin ligase complex, designated LUBAC (linear ubiquitin chain assembly complex), was also shown to be part of the TNFR1 signaling complex and to play a key role in NF- $\kappa$ B activation by catalyzing the assembly of linear ubiquitin chains [18,19,20,21].

Activation of NF- $\kappa$ B by IL1 $\beta$  and lipopolysaccharide involve similar components. Binding of these ligands to their receptors initially results in the recruitment of MyD88 [22]. Subsequently, MyD88 recruits kinases IRAK4 and IRAK1 and E3 ligase TRAF6, which results in IRAK1 phosphorylation, release of IRAK1/TRAF6 and TRAF6 autoubiquitination [23,24,25]. Ubiquitinated TRAF6 is then believed to recruit the TAK1 complex and in concert with Ubc13, modify both TAK1 and IRAK1 with Lys63-linked chains [26,27]. The final step in this process involves recruitment of the IKKs through NEMO and their phosphorylation/activation by TAK1 [26,28].

Kaposi's sarcoma (KS) associated herpesvirus (KSHV), also known as Human herpesvirus 8 (HHV8), is the commonest cause of malignancy among patients with Acquired Immunodeficiency Syndrome [29,30]. Infection with KSHV has been associated with KS, primary effusion lymphoma (PEL) and multicentric Castlemann's disease (MCD) [31]. KSHV encodes a vFLIP (viral FLICE inhibitory Protein), encoded by the open reading frame K13, which is one of the few viral proteins to be expressed in cells latently-infected with KSHV [32]. Based on its structural homology to the prodomain of FLICE/caspase 8 [33], K13 was initially believed to be an inhibitor of FLICE/caspase 8 (hence the name vFLIP) [33]. However, subsequent work by our laboratory and others have demonstrated that the main biological function of K13 is the activation of the NF- $\kappa$ B pathway rather than inhibition of caspase 8/FLICE, and that it utilizes this pathway to promote cellular survival, proliferation, transformation and cytokine secretion [34,35,36,37,38]. We recently demonstrated that K13 bypasses TRAF2 and TRAF3 and activates the NF- $\kappa$ B pathway by directly binding to the NEMO subunit of the IKK complex [39]. However, it is not clear how K13-NEMO interaction results in the activation of the IKK complex. In this study, we have investigated the role of TRAF6, TAK1 and LUBAC in K13-induced NF- $\kappa$ B activation. We demonstrate that K13 activates the NF- $\kappa$ B pathway independent of TRAF6 and TAK1. Furthermore, linear polyubiquitination of NEMO is not required for K13-induced NF- $\kappa$ B activation. Instead, NEMO is required for mediating the interaction between K13 and IKK1 and IKK2. Our results suggest that K13 activates the NF- $\kappa$ B pathway using a mechanism distinct from that utilized by proinflammatory cytokines.

## Materials and Methods

### Cell Lines and Reagents

293T, BC1, BCBL1, Jurkat and Namalwa cells were obtained from ATCC (Manassas, VA). BCBL1 and Namalwa cells expressing an empty vector and K13 have been described previously [39,40]. Wild-type and NEMO-deficient cells have also been described previously [41]. *TRAF6*<sup>+/+</sup> and *TRAF6*<sup>-/-</sup> mouse embryonic fibroblasts (MEFs) were gifts from Tak Mak (University of Toronto, Canada) [24]. *TAK1*<sup>+/+</sup> and *TAK1*<sup>-/-</sup> MEFs were generously provided by Dr. Stephanie S. Watowich (MD Anderson Cancer Center, Houston, Texas). *HOIL-1*<sup>-/-</sup> and *cpdm* cells were kindly provided by Dr. Kazuhiro Iwai (Osaka University, Japan). TAK1 inhibitor 5Z-7-oxo-zeaenol was purchased from Tocris Bioscience (Ellisville, MO), recombinant

TNF $\alpha$  and IL-1 $\beta$  were from Peprotech (Rocky Hill, NJ), and 4-Hydroxytamoxifen (4OHT) was purchased from Sigma (St. Louis, MO).

### Plasmids

Plasmids encoding K13 and 4-Hydroxytamoxifen (4OHT)-inducible K13-ER<sup>TAM</sup>, CYLD, EDAR (ectodermal dysplasia receptor) and NEMO have been described previously [36,37,39,42,43]. Retroviral constructs expressing NEMO mutants defective in linear ubiquitination were kindly provided by Dr. Ivan Dikic (Goethe University Medical School). Recombinant retroviruses were generated and used to generate polyclonal populations of stably transduced MEFs following selection with puromycin essentially as described previously [44].

### Luciferase Reporter Assay

293T cells were transfected in a 24-well plate with various test plasmids along with an NF- $\kappa$ B luciferase reporter construct (75 ng/well) and a pRSV/LacZ ( $\beta$ -galactosidase) reporter construct (75 ng/well) as described previously [42]. Cells were lysed 24–36 h later, and extracts were used for the measurement of firefly luciferase and  $\beta$ -galactosidase activities, respectively. Luciferase activity was normalized relative to the  $\beta$ -galactosidase activity to control for the difference in the transfection efficiency. Transient transfection of MEFs and measurement of luciferase activity was performed essentially as described previously [45]. Briefly, MEFs were transfected in duplicate using Lipofectamine 2000 (Invitrogen, Carlsbad, CA) in a 24-well plate with the various test plasmids along with an NF- $\kappa$ B/luciferase reporter construct (75 ng/well) and a *Renilla* luciferase reporter construct (phRG-TK, 75 ng/well, Promega, Madison, WI). The cells were lysed 48 hours later, and extracts were used for the measurement of firefly and *Renilla* luciferase activities as described in the Dual-Luciferase<sup>®</sup> Reporter (DLR<sup>TM</sup>) Assay system from Promega. Firefly luciferase activity was normalized relative to the *Renilla* luciferase activity to control for the difference in the transfection efficiency.

### Western Blot

Western blot analysis was performed essentially as described previously [34]. Primary antibodies used in these experiments were: NEMO, Total-I $\kappa$ B $\alpha$ , Rel B, TRAF6 (Santa Cruz Biotechnology, Santa Cruz, CA); tubulin, M2 FLAG (Sigma, St. Louis, MO), and phospho-TAK1, phospho-I $\kappa$ B $\alpha$  and A20 (Cell Signaling, Danvers, MA). A mouse monoclonal antibody against K13 (8F6) was raised in our laboratory.

### NF- $\kappa$ B DNA-binding Assays

The NF- $\kappa$ B subunit composition of the K13-induced NF- $\kappa$ B complexes in wild-type and *TAK1*<sup>-/-</sup> MEFs was determined with an NF- $\kappa$ B ELISA kit (TransAM NF- $\kappa$ B; Active Motif, Carlsbad, CA) according to the manufacturers' instructions. The electrophoretic mobility shift assay was performed as described previously [34].

### Pathscan ELISA Assay

The PathScan Phospho-IKK $\alpha$  (Ser176/180), Phospho-IKK $\beta$  (Ser177/181) sandwich ELISA Kits and PathScan Phospho-I $\kappa$ B $\alpha$  (Ser32) sandwich ELISA antibody pair (Cell Signaling, Danvers, MA) were used to detect endogenous levels of IKK $\alpha$ , IKK $\beta$  and I $\kappa$ B $\alpha$  proteins when phosphorylated at Ser176/180, Ser177/181 and Ser32, respectively.

## Statistical Analyses

Two-tailed paired Student's *t* test was used to test for differences between two groups. Differences with a  $p \leq 0.05$  were considered as statistically significant. All experiments were repeated a minimum of three times with duplicate/triplicate samples.

## Results

### TRAF6 is not Required for K13-induced NF- $\kappa$ B Activation

Different members of the TRAF family are required for NF- $\kappa$ B activation by distinct stimuli. Thus, while TRAF2 is known to be required for NF- $\kappa$ B activation by TNF $\alpha$ , TRAF6 has been implicated in the activation of this pathway signaling via interleukin 1 and Toll like receptors [46,47]. We have recently demonstrated that TRAF2 is not involved in K13-induced NF- $\kappa$ B activation [39]. To rule out the involvement of TRAF6 in K13-induced NF- $\kappa$ B activity, we transiently transfected *TRAF6*<sup>+/+</sup> and *TRAF6*<sup>-/-</sup> MEFs with an empty vector or a K13 expression construct and examined the activation of a cotransfected NF- $\kappa$ B-Luc reporter construct. As shown in Figure 1A, we observed near equivalent K13-induced NF- $\kappa$ B-Luc activity in the *TRAF6*<sup>+/+</sup> and *TRAF6*<sup>-/-</sup> MEFs. Essentially similar results were obtained when the experiment was repeated using the K13-ER<sup>TAM</sup> construct followed by treatment with 4OHT (Fig. 1B). Finally, we generated stable populations of *TRAF6*<sup>+/+</sup> and *TRAF6*<sup>-/-</sup> MEFs expressing an empty vector or the K13-ER<sup>TAM</sup> construct. The mutated estrogen receptor (ER<sup>TAM</sup>) in the K13-ER<sup>TAM</sup> construct does not bind to its physiological ligand estrogen but binds with very high affinity to the synthetic ligand 4OHT (4-hydroxytamoxifen) and allows the control of K13 activity in a 4OHT-dependent fashion [48]. We treated the resulted cells with 4OHT to activate K13 activity and assessed the activation of the NF- $\kappa$ B pathway by measuring the upregulation of A20, a protein known to be induced by K13-induced NF- $\kappa$ B activity [49]. As shown in Fig. 1C, treatment with 4OHT resulted in equivalent upregulation of A20 in the *TRAF6*<sup>+/+</sup> and *TRAF6*<sup>-/-</sup>, which argues against the involvement of TRAF6 in K13-induced NF- $\kappa$ B activation.

### TAK1 is not Required for K13-induced NF- $\kappa$ B Activation

TRAF6 is believed to activate NF- $\kappa$ B by activating TAK1, which in turn phosphorylates and activates the IKK complex resulting in NF- $\kappa$ B activation [7,8]. TAK1 was also shown to be required for NF- $\kappa$ B activation by KSHV-encoded viral G protein coupled receptor (vGPCR) [50]. To study the role of TAK1 in K13-induced NF- $\kappa$ B activation, we took advantage of murine embryonic fibroblast (MEFs) cells deficient in this protein. We used retroviral-mediated gene transfer to generate stable pools of wild-type and *TAK1*<sup>-/-</sup> MEFs expressing an empty vector and FLAG-tagged K13. An immunoblot analysis confirmed equivalent expression of the K13 in the wild-type (WT) and *TAK1*<sup>-/-</sup> MEFs (Fig. 2A). The expression of K13 in the wild-type (WT) and *TAK1*<sup>-/-</sup> MEFs, however, was lower than its expression in the KSHV-infected BC1 cell line (Fig. 2A). We subsequently used an electrophoretic mobility shift assay (EMSA) to compare the ability of K13 to activate the NF- $\kappa$ B pathway in the two cell lines. Consistent with the known ability of K13 to activate the NF- $\kappa$ B pathway, ectopic expression of K13 in the *TAK1*<sup>+/+</sup> MEFs resulted in increased nuclear NF- $\kappa$ B DNA binding activity (Fig. 2B). However, an equivalent increase in NF- $\kappa$ B DNA binding activity was observed upon ectopic expression of K13 in the *TAK1*<sup>-/-</sup> cells (Fig. 2B). To confirm these results, we generated stable clones of WT and *TAK1*<sup>-/-</sup> MEFs expressing the K13-ER<sup>TAM</sup> fusion protein and used an ELISA-based DNA-binding assay to study the subunit composition of NF- $\kappa$ B

complexes induced following treatment with 4OHT in the two cell lines. This assay revealed that p65 and p50 were the major NF- $\kappa$ B subunits induced by 4OHT in both the WT and *TAK1*<sup>-/-</sup> K13-ER<sup>TAM</sup> expressing MEFs, with modest induction of p52, RelB and cRel subunits (Fig. 2C). Thus, TAK1 has no major effect on either the amount or subunit composition of NF- $\kappa$ B complexes induced by K13. We next examined the effect of TAK1 on K13-induced NF- $\kappa$ B transcriptional activity. For this purpose, we transiently transfected an empty vector or a K13-ER<sup>TAM</sup>-fusion construct in wild-type and *TAK1*<sup>-/-</sup> MEFs and measured NF- $\kappa$ B transcriptional activation using an NF- $\kappa$ B luciferase reporter assay. As shown in Figure 2D, transfection of *TAK1*<sup>+/+</sup> MEFs with K13-ER<sup>TAM</sup> followed by treatment with 4OHT resulted in a significant increase in NF- $\kappa$ B-Luc reporter activity. However, 4OHT treatment of K13-ER<sup>TAM</sup>-transfected *TAK1*<sup>-/-</sup> MEFs also led to an equivalent increase in NF- $\kappa$ B-Luc activity, thereby demonstrating that TAK1 is not required for K13-induced NF- $\kappa$ B transcriptional activation.

### K13 does not Induce TAK1 Phosphorylation

Human T-cell Leukemia virus 1 (HTLV-1) encoded Tax protein resembles K13 in activating the NF- $\kappa$ B pathway by binding to NEMO [51]. It was recently shown that TAK1 is constitutively activated by Thr-187 phosphorylation in Tax-positive HTLV-1-transformed T cells [52]. Therefore, to examine whether K13 would similarly induce TAK1 Thr-187 phosphorylation, we used retroviral-mediated gene transfer and generated polyclonal populations of two lymphoma cell lines, BCBL1 and Namalwa, expressing an empty vector and FLAG-K13. We chose these cell lines as they possess low to none constitutive NF- $\kappa$ B activity endogenously (Fig. 2E). Ectopic expression of K13 in both BCBL1 and Namalwa cells failed to induce phosphorylation of TAK1 as determined by Western blotting with a phospho-Thr184/Thr187 TAK1 antibody, whereas treatment with TNF $\alpha$  successfully did so (Fig. 2F). Thus, in contrast to HTLV-1 oncoprotein Tax, K13 does not induce TAK1 phosphorylation.

### K13-induced NF- $\kappa$ B is not Blocked by a Specific Inhibitor of TAK1

5Z-7-Oxozeaenol, a resorcylic lactone of fungal origin, is a potent and selective inhibitor of TAK1 [53]. To confirm the lack of involvement of TAK1 in K13-induced NF- $\kappa$ B activity, we studied the effect of increasing doses of 5Z-7-Oxozeaenol treatment on 4OHT induced NF- $\kappa$ B luciferase activity in 293NF- $\kappa$ B-Luc- K13-ER<sup>TAM</sup> cells which stably express an NF- $\kappa$ B-driven luciferase reporter construct and the K13-ER<sup>TAM</sup> fusion protein. As shown in Figure 2G, treatment with up to 1  $\mu$ M 5Z-7-Oxozeaenol had no significant inhibitory effect on 4OHT-induced NF- $\kappa$ B reporter activity. In comparison, 0.5  $\mu$ M 5Z-7-Oxozeaenol significantly inhibited TNF $\alpha$  and IL-1 $\beta$ -induced NF- $\kappa$ B activity in the 293NF- $\kappa$ B-Luc reporter cells (Fig. 2H). Taken collectively with previous studies, the above results confirm that TAK1 is not required for K13-induced NF- $\kappa$ B activation.

### HOIL-1 is not Essential for K13-induced NF- $\kappa$ B Activation

Recently, a novel ubiquitin ligase complex, designated LUBAC (linear ubiquitin chain assembly complex), which is composed of two RING finger proteins, HOIL-1 (also known as RBCK1) and HOIP, and SHARPIN (SHANK-associated RH domain interacting protein in postsynaptic density) was shown to play a key role in the activation of the NF- $\kappa$ B pathway by binding to NEMO and conjugating linear polyubiquitin chains onto its specific Lys residues [18,19,20]. We used *HOIL-1*-null MEFs to test the



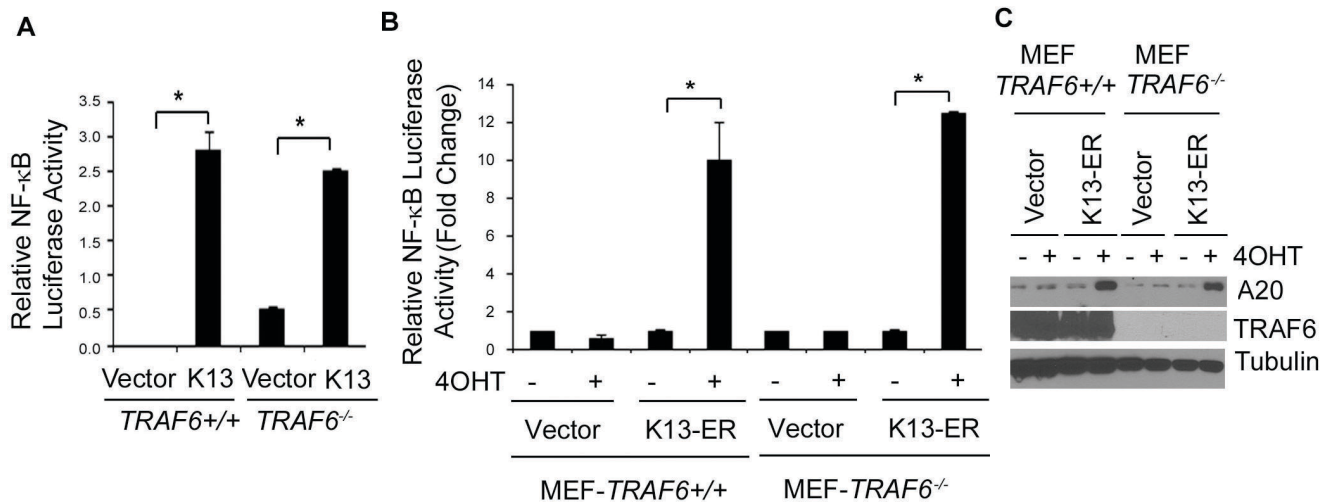

**Figure 1. TRAF6 is not required for K13-induced NF-κB activation.** **A.** *TRAF6*<sup>+/+</sup> and *TRAF6*<sup>-/-</sup> MEFs were transfected with a control vector or vector encoding K13 along with an NF-κB-Luc construct (75 ng/well) and a Renilla reporter construct (75 ng/well, normalization control) using Lipofectamine 2000-mediated transfection. The luciferase reporter assay was performed 48 hours post transfection essentially as described in "Materials and Methods" section. Asterisks (\*) indicate significance at levels of  $p \leq 0.05$ . **B.** *TRAF6*<sup>+/+</sup> and *TRAF6*<sup>-/-</sup> MEFs were transfected with a control vector or a vector encoding K13-ER<sup>TAM</sup> along with an NF-κB-Luc construct and a Renilla reporter construct. The transfected cells were subsequently treated with 4OHT (20 nM) for 48 hours and the reporter assays performed as described above. The values shown are averages (mean  $\pm$  SE) of one representative experiment out of three in which each transfection was performed in duplicate. Asterisks (\*) indicate significance at levels of  $p \leq 0.05$ . **C.** *TRAF6*<sup>+/+</sup> and *TRAF6*<sup>-/-</sup> MEF cells expressing an empty vector or the FLAG-tagged K13-ER<sup>TAM</sup> treated with 4OHT were examined by immunoblot analysis for upregulation of A20. Tubulin was used as a loading control. doi:10.1371/journal.pone.0036601.g001

involvement of LUBAC-induced linear polyubiquitination in K13-induced NF-κB activation. For this purpose, we generated stable populations of wild-type and *HOIL-1*-null MEFs expressing and empty vector and FLAG-tagged K13-ER<sup>TAM</sup> construct. A Western blot analysis confirmed expression of the K13-ER<sup>TAM</sup>-fusion protein in both wild-type and *HOIL-1*<sup>-/-</sup> MEFs, with slightly higher expression in the latter (Fig. 3A). We measured NF-κB transcriptional activation in the resulting cells with and without 4OHT treatment using an NF-κB luciferase reporter assay. As shown in Figure 3B, we observed robust activation of NF-κB-Luc activity upon 4OHT treatment in both the WT-K13-ER<sup>TAM</sup> and *HOIL-1*<sup>-/-</sup> K13-ER<sup>TAM</sup> cells, arguing against the possibility that HOIL-1 is required for K13-induced NF-κB activity. Indeed, the *HOIL-1*<sup>-/-</sup> K13-ER<sup>TAM</sup> cells showed a greater increase in NF-κB-Luc activity as compared to the WT-K13-ER<sup>TAM</sup> cells upon 4OHT treatment, which was probably due to the higher level expression of the K13-ER<sup>TAM</sup> protein in the former. Consistent with the lack of requirement of HOIL-1 in K13-induced NF-κB activity, we observed equivalent increase in nuclear p65 DNA-binding activity in the wild-type and *HOIL-1*<sup>-/-</sup> MEFs upon ectopic K13 expression (Fig. 3D–E). In contrast, TNFα-induced NF-κB-Luc and p65 DNA binding activities were markedly reduced in *HOIL-1*<sup>-/-</sup> MEFs (Fig. 3C, 3F). Finally, to confirm the lack of involvement of *HOIL-1* in K13-induced NF-κB activity, we used Western blot analysis to compare the phosphorylation of IκBα and expression of A20 and RelB, two proteins that are known to be upregulated by the NF-κB pathway, in the wild-type and *HOIL-1*<sup>-/-</sup> MEFs stably expressing K13. As shown in Figure 3G, we observed increased phosphorylation of IκBα and upregulation of A20 and RelB in both wild-type and *HOIL-1*<sup>-/-</sup> MEFs upon ectopic K13 expression, which argues against an essential role of HOIL-1 in K13-induced NF-κB activity. Indeed, K13-expressing *HOIL-1*<sup>-/-</sup> MEFs showed slightly more IκBα phosphorylation and A20 and RelB expression as compared to the K13-expressing wild-type MEFs. This was probably due to

slightly higher level of ectopic K13 expression in the latter (Fig. 3G).

#### Sharpin is not Essential for K13-induced NF-κB Activation

Mutation in *Sharpin* (SHANK-associated RH domain interacting protein in postsynaptic density) gene are responsible for *cpdm* (chronic proliferative dermatitis) phenotype in mice that resembles the phenotype of patients with X-linked hyper-IgM syndrome and hypohydrotic ectodermal dysplasia (XHMED), which is caused by mutations in NEMO [54]. SHARPIN shows significant similarity to HOIL-1 and was recently shown to be a component of LUBAC and to be required for linear ubiquitination of NEMO and NF-κB activation [19,20,21]. To examine whether SHARPIN is required for K13-induced NF-κB activity, we examined the ability of K13 to activate an NF-κB-Luc reporter construct in *cpdm* MEFs. As shown in Figure 4A, transient transfection of K13 strongly activated the NF-κB-Luc reporter in *cpdm* MEFs, whereas treatment with TNFα failed to do so. We also generated stable populations of wild-type and *cpdm* MEFs expressing K13 and observed equivalent increase in the nuclear p65/RelA DNA-binding activity upon ectopic K13 expression (Fig. 4B). Finally, ectopic K13 expression also resulted in an increase in IκBα phosphorylation and enhanced expression of the NF-κB target proteins A20 and RelB in the *cpdm* MEFs (Fig. 4C). Taken collectively, the above results demonstrate that SHARPIN is not essential for K13-induced NF-κB activity.

#### NEMO Mutants Defective in Binding to Linear Polyubiquitin Chains Support K13-Induced NF-κB

NEMO was recently shown to selectively bind linear ubiquitin chains and NEMO mutants V293A/Y301A/K302A and F305A that are defective in binding linear ubiquitin chains were shown to be incapable of supporting NF-κB activation by TNFα and other agonists [55]. Therefore, as an independent test of the involvement

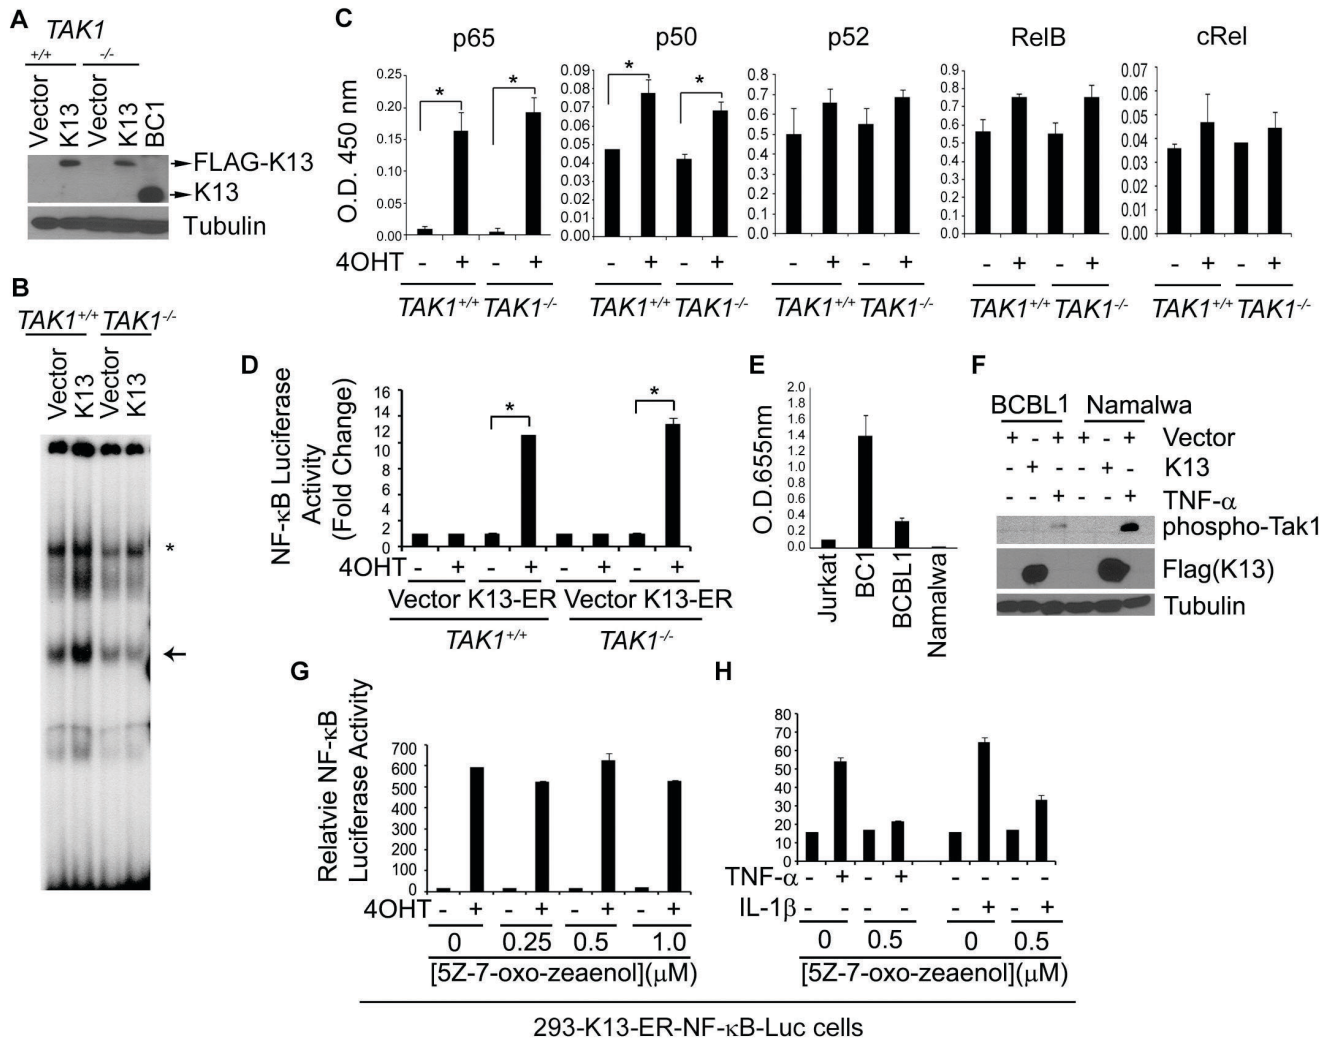

**Figure 2. K13 activates NF-κB pathway without involving TAK1.** **A.** Immunoblot showing expression of ectopically expressed FLAG-tagged K13 in *TAK1*<sup>+/+</sup> and *TAK1*<sup>-/-</sup> MEFs and endogenous K13 in BC1 cell line. **B.** Status of NF-κB pathway, as measured by an EMSA in *TAK1*<sup>+/+</sup> and *TAK1*<sup>-/-</sup> MEF cells stably expressing vector and K13. The position of the induced NF-κB complexes is marked by an asterisk, while an arrow marks the position of the constitutive complexes. **C.** The NF-κB subunits composition of the K13-induced nuclear NF-κB complexes in the wild-type and *TAK1*<sup>-/-</sup> MEFs was determined with an ELISA-based DNA-binding assay performed in triplicate. Asterisks (\*) indicate significance at levels of  $p \leq 0.05$ . **D.** *TAK1*<sup>+/+</sup> and *TAK1*<sup>-/-</sup> MEFs expressing FLAG-K13-ER<sup>TAM</sup> were transfected with NF-κB-Luc and Renilla reporter constructs and subsequently treated with 4OHT (20 nM) for 48 hours and the reporter assays performed as described in Figure 1A. Asterisks (\*) indicate significance at levels of  $p \leq 0.05$ . **E.** Nuclear extracts from Jurkat, BC1, BCBL1 and Namalwa were used for the measurement of p65 DNA-binding activity using an ELISA-based assay. **F.** Lack of phosphorylation of TAK1 by K13. Cell lysates prepared from BCBL1 and Namalwa cells expressing an empty vector or FLAG-K13 were probed with an antibody to detect phosphorylation of TAK1. Vector cells treated with TNF $\alpha$  were used as a positive control. The blot was re-probed with FLAG and Tubulin antibodies to check the expression of the transduced K13 and equal protein loading, respectively. **G–H.** Treatment with TAK1 inhibitor 5Z-7-oxo-zeaenol had no effect on 4OHT induced NF-κB-Luc activity in 293-K13-ER<sup>TAM</sup>-NF-κB-Luc cells but effectively blocked TNF $\alpha$  and IL1 $\beta$  induced NF-κB-Luc activity.  
doi:10.1371/journal.pone.0036601.g002

of linear polyubiquitination in K13-induced NF-κB activity, we reconstituted NEMO-deficient MEFs with an empty vector, wild-type NEMO, NEMO-V293A/Y301A/K302A and NEMO-F305A using retroviral mediated gene transfer (Fig. 5A). In the resulting cells, we stably expressed an empty vector and K13 (Fig. 5B). After confirming the equivalent expression of the transduced proteins by Western blotting, we examined the status of the NF-κB by measuring nuclear p65/RelA DNA binding activity. Ectopic expression of K13 failed to induce nuclear p65/RelA DNA binding activity in the *NEMO*<sup>-/-</sup> MEFs reconstituted with an empty vector, but resulted in approximately 3 fold increase in the nuclear p65/RelA DNA binding activity in those

reconstituted with the wild-type NEMO, thereby confirming that NEMO is required for K13-induced NF-κB activation (Fig. 5C). More importantly, we observed an equivalent increase in K13-induced nuclear p65/RelA DNA binding activity in *NEMO*<sup>-/-</sup> MEFs reconstituted with NEMO-V293A/Y301A/K302A and NEMO-F305A mutants, respectively (Fig. 5C). Thus, binding of NEMO to linear polyubiquitin chain is not required for K13-induced NF-κB activation.

#### CYLD Fails to Block K13-induced NF-κB Activity

The deubiquitylating enzyme CYLD, a negative regulator of the NF-κB pathway, can cleave linear ubiquitin chains [56,57].

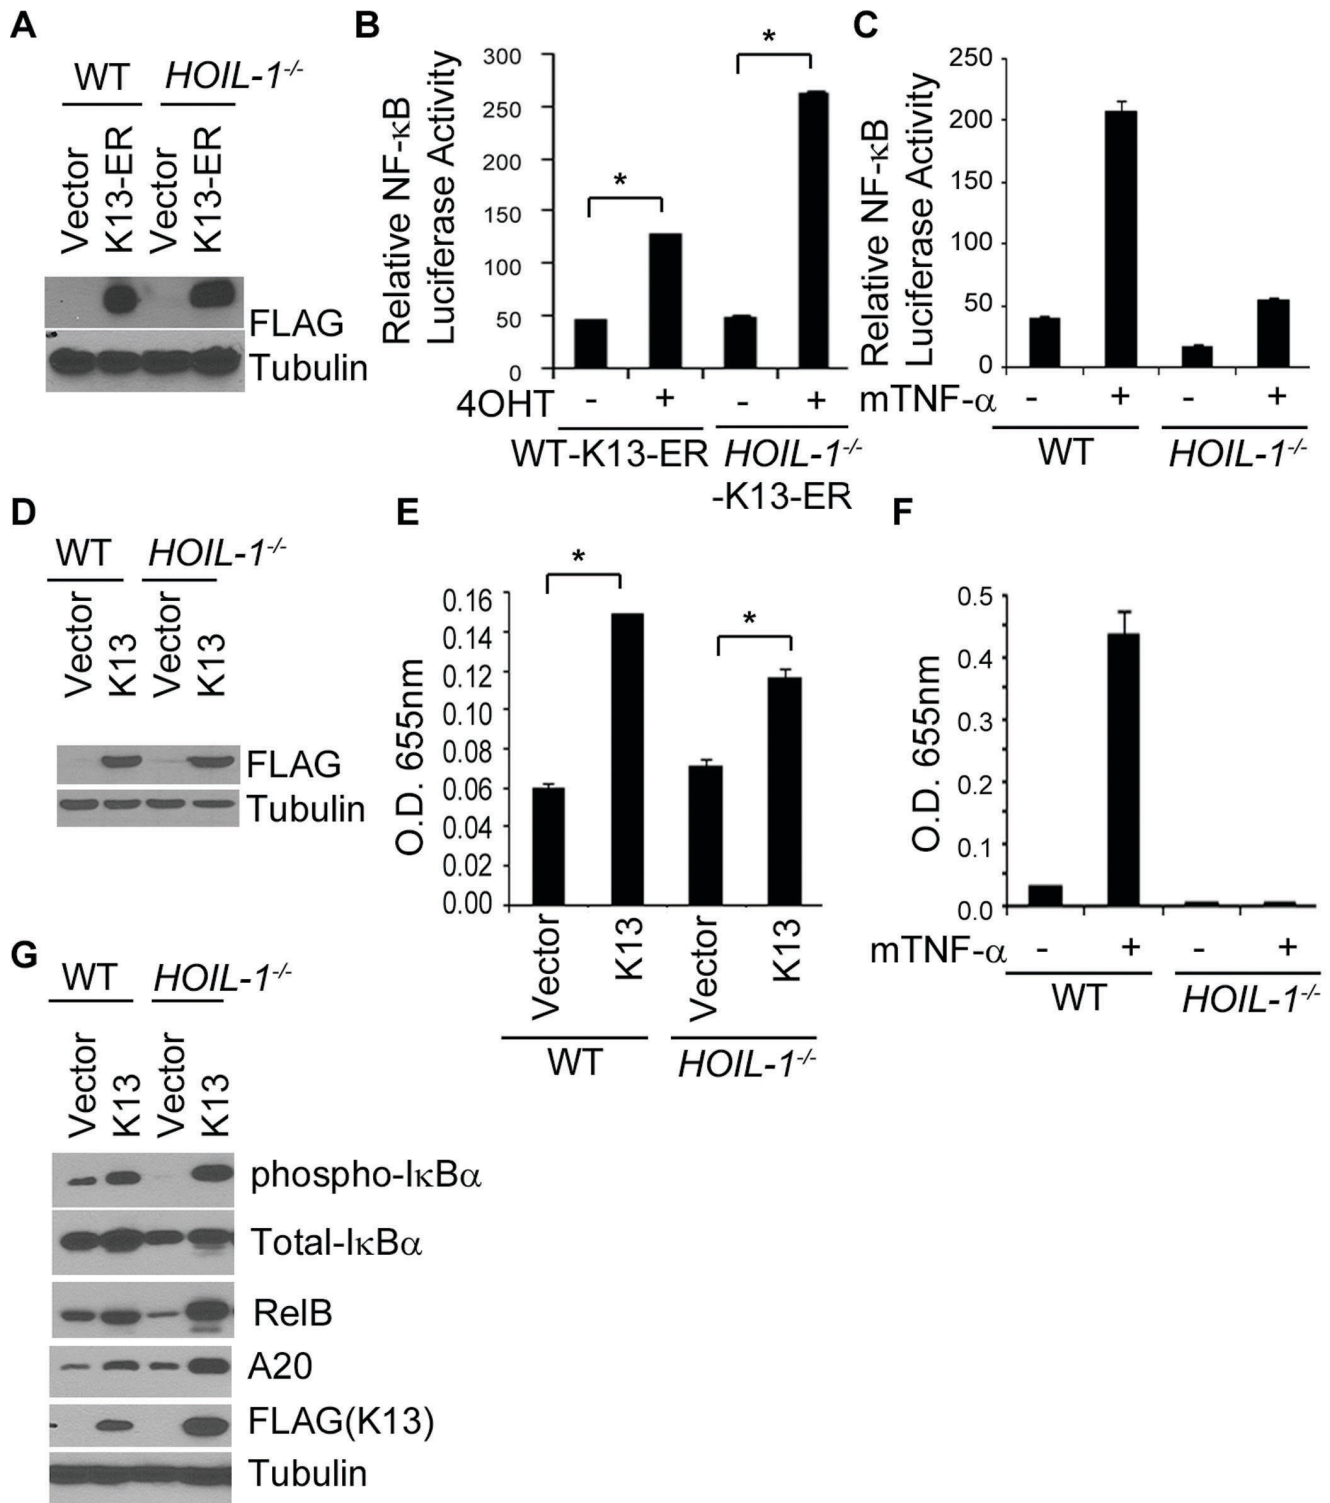

**Figure 3. HOIL-1 is not essential for K13-induced NF- $\kappa$ B activation.** **A.** The expression of FLAG-tagged K13-ER<sup>TAM</sup> in wild-type and *HOIL-1*<sup>-/-</sup> MEF was confirmed with Western blotting. The blot was re-probed with a tubulin antibody to show equal protein loading. **B.** Wild-type and *HOIL-1*<sup>-/-</sup> MEFs stably expressing FLAG-K13-ER<sup>TAM</sup> were transfected with NF- $\kappa$ B-Luc and Renilla reporter constructs. Cells were subsequently treated with 4OHT (20 nM) for 48 hours and the luciferase reporter assay was performed essentially as described in Figure 1A. Asterisks (\*) indicate significance at levels of  $p \leq 0.05$  as compared to vehicle-treated cells. **C.** Wild-type and *HOIL-1*<sup>-/-</sup> MEFs were transfected with NF- $\kappa$ B-Luc and Renilla reporter constructs and 6 hours post-transfection, these cells were treated with mTNF- $\alpha$  (10ng/ml) for 18 hours and the luciferase reporter assay was performed essentially as described in Figure 1A. **D.** Expression of transduced FLAG-tagged K13 in wild-type and *HOIL-1*<sup>-/-</sup> MEFs was examined by immunoblot analysis; tubulin was used as a loading control. **E.** Nuclear p65 DNA binding activities in the nuclear extracts of wild-type and *HOIL-1*<sup>-/-</sup> MEFs expressing an empty vector or FLAG-K13. Asterisks (\*) indicate significance at levels of  $p \leq 0.05$  as compared to vector cells. **F.** Nuclear p65 DNA binding activities in the nuclear extracts of wild-type and *HOIL-1*<sup>-/-</sup> MEFs following treatment with murine TNF $\alpha$ . **G.** Wild-type and *HOIL-1*<sup>-/-</sup> MEFs

expressing FLAG-K13 were examined for NF- $\kappa$ B activation by Western blot analysis using antibodies against phospho-I $\kappa$ B $\alpha$ , Total I $\kappa$ B $\alpha$ , A20 and RelB. The blot was re-probed with FLAG and Tubulin antibodies to check the expression of the transduced K13 and equal protein loading, respectively. doi:10.1371/journal.pone.0036601.g003

As another independent test to rule out the involvement of linear Ub chains in K13-induced NF- $\kappa$ B activation, we tested the ability of CYLD to block K13-induced NF- $\kappa$ B-Luc reporter activity. We used TNFR1, CD40, and EDAR (Ectodermal Dysplasia Receptor) as controls for this experiment since NF- $\kappa$ B activation by these receptors is known to require linear polyubiquitination or is inhibited by CYLD [58,59]. As shown in Figure 6A-D, coexpression of CYLD had no effect on K13-induced NF- $\kappa$ B activity but effectively blocked TNFR1, CD40 and EDAR-induced NF- $\kappa$ B activity. Thus, in contrast to the receptors of the TNFR family, K13-induced NF- $\kappa$ B is not dependent on linear ubiquitin chains.

### Essential Role of NEMO in Mediating K13-IKK Interaction and IKK Activation

We and others have previously demonstrated that K13 interacts with NEMO and NEMO is essential for K13-induced NF- $\kappa$ B activation [34,60]. The studies in the preceding section clearly demonstrate that TAK1, TRAF6 and linear polyubiquitination of NEMO are not involved in K13-induced NF- $\kappa$ B activation. Therefore, to explain the role of NEMO in K13-induced NF- $\kappa$ B activation, we tested the hypothesis that NEMO mediates the interaction between K13 and IKK1 and IKK2. For this purpose, FLAG-tagged K13 was immunoprecipitated from the WT and NEMO-deficient Jurkat cells using Flag or control antibody beads and its interaction with endogenously expressed NEMO, IKK1 and IKK2 was examined by Western blot analysis. As shown in

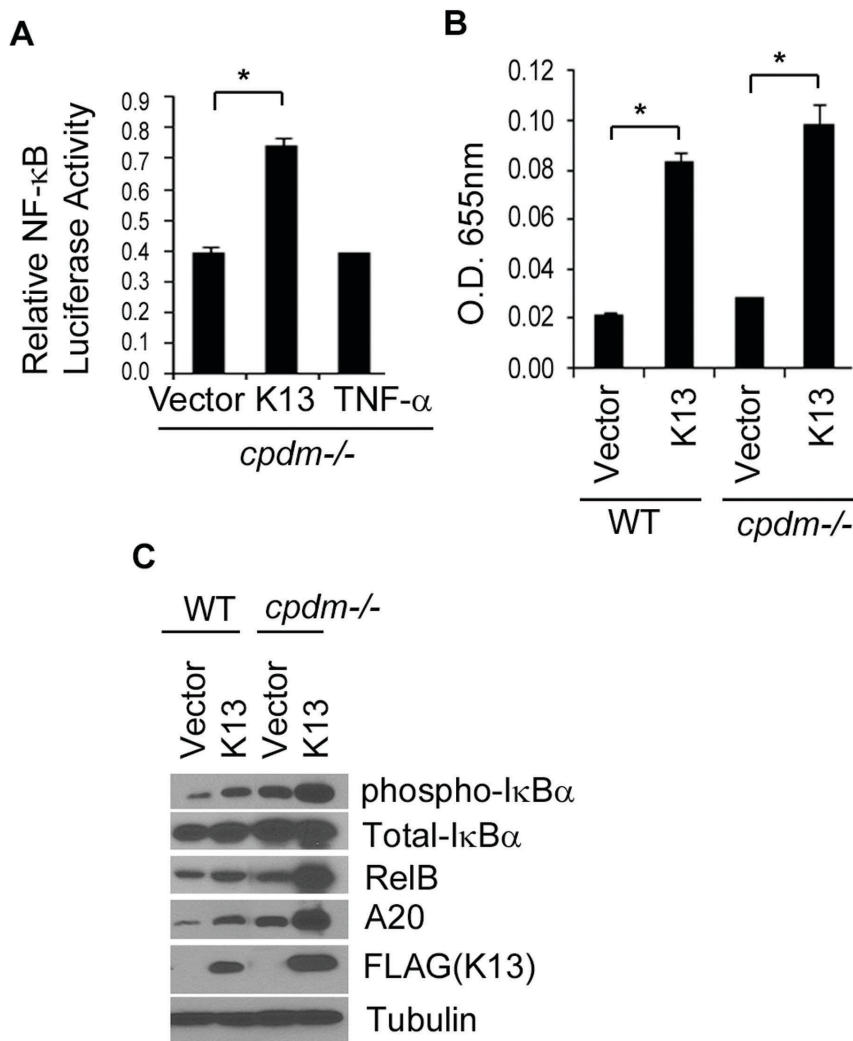

**Figure 4. SHARPIN is not required for K13-induced NF- $\kappa$ B activation.** **A.** MEFs deficient in SHARPIN (*cpdm*) were able to activate NF- $\kappa$ B reporter activity in the presence of K13, but not with TNF $\alpha$ . Asterisks (\*) indicate significance at levels of  $p \leq 0.05$ . **B.** SHARPIN is not required for K13-induced NF- $\kappa$ B p65 DNA binding as determined by ELISA. Asterisks (\*) indicate significance at levels of  $p \leq 0.05$  as compared to vehicle-treated cells. **C.** Total cell lysates from wild-type, and *cpdm* MEF stably expressing an empty vector or FLAG-tagged K13 were used to examine the requirement of SHARPIN on K13-induced NF- $\kappa$ B activation by upregulation of expression of A20, RelB, phosphorylation of I $\kappa$ B $\alpha$  and degradation of total I $\kappa$ B $\alpha$ . The expression of the FLAG-tagged K13 protein and equal protein loading was confirmed by blotting with FLAG and Tubulin antibodies, respectively. doi:10.1371/journal.pone.0036601.g004



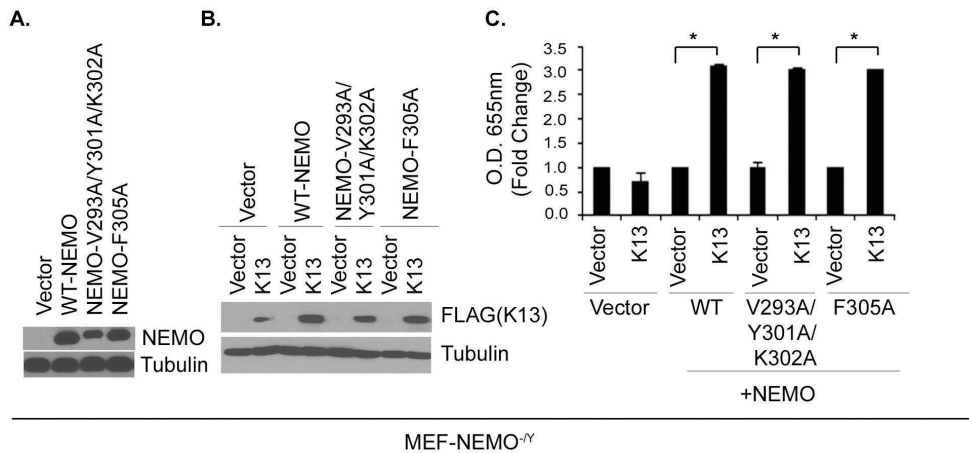

**Figure 5. The ability of K13 to activate NF- $\kappa$ B pathway does not require linear polyubiquitination of NEMO.** **A–B.** MEF NEMO<sup>-/-</sup> cells were stably transduced with wild-type NEMO and two NEMO mutants defective in linear ubiquitination of NEMO (NEMO-Y293A/Y301A/K302A and NEMO-F305A) and their expression was confirmed by immunoblotting using NEMO antibody. These cells were further transduced with either an empty retroviral vector or a retroviral vector expressing FLAG-tagged K13 and their expression was determined by immunoblotting with FLAG antibody. The blot was re-probed with a tubulin antibody to show equal loading of protein. **C.** Upon expression of K13, these cells were able to activate NF- $\kappa$ B p65 DNA binding as determined by ELISA. The values shown are averages (mean  $\pm$  SE) of one representative experiment out of three in which the level of p65 DNA binding was measured in triplicate. Asterisks (\*) indicate significance at levels of  $p \leq 0.05$ . doi:10.1371/journal.pone.0036601.g005

Figure 7A, while interaction of K13 with NEMO, IKK1, and IKK2 was readily detected in samples immunoprecipitated with Flag antibody from wild-type Jurkat cells, no significant interaction between K13 and IKK1 or IKK2 was observed in the NEMO-deficient Jurkat cells. Stimulation of cells with TNF $\alpha$  or IL-1 induces recruitment of IKK1 and IKK2 to NEMO and their subsequent phosphorylation and activation [61,62]. The relevant phosphorylation sites in IKK1 and IKK2 have been mapped to regions in their catalytic domain that shares strong homology with “T loop” regulatory sequences found in the members of the mitogen activated protein kinase kinase (MAP2K) family of enzymes [61,62]. These sites include Ser176 and Ser180 for IKK1 and Ser177 and Ser181 for IKK2. We next examined if recruitment of IKK1 and IKK2 to the K13-NEMO complex is also associated with “T Loop” phosphorylation of IKK1, IKK2 or both. The K13-ER<sup>TAM</sup> expressing MEFs were treated with

4OHT and phosphorylation status of IKK1 and IKK2 was determined using Pathscan phospho-IKK1(Ser176/180) and phospho-IKK2 (Ser177/181) ELISA kits, respectively. As shown in Figure 7C, 4OHT treatment of K13-ER<sup>TAM</sup> cells resulted in a significant increase in “T loop” phosphorylation of IKK1, IKK2 as compared to the untreated cells. The K13-induced increased “T loop” phosphorylation of IKK1 and IKK2 was also associated with increased phosphorylation of I $\kappa$ B $\alpha$ . Thus, recruitment of IKK1 and IKK2 to the K13-NEMO complex results in their activation by “T loop” phosphorylation.

## Discussion

K13 is known to activate the NF- $\kappa$ B pathway by binding to activating the ~700 kDa IKK complex consisting of IKK1/IKK $\alpha$ , IKK2/IKK $\beta$  and NEMO/IKK $\gamma$  [34]. We have previously

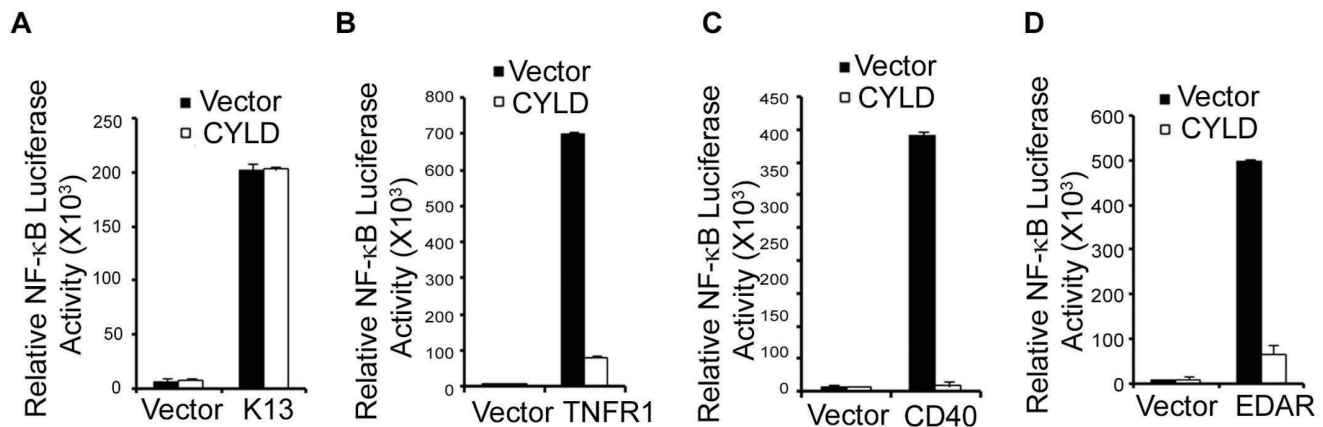

**Figure 6. Deubiquitinating enzyme CYLD, a negative regulator of NF- $\kappa$ B pathway does not block K13-induced NF- $\kappa$ B activity.** **A–D.** The 293T cells were co-transfected with a control vector or vectors encoding FLAG-K13, TNFR1, CD40 and EDAR (250 ng/ml) and a CYLD plasmid construct (750 ng/well) along with NF- $\kappa$ B-Luc reporter construct (75 ng/well) and a pRSV/LacZ ( $\beta$ -galactosidase) reporter construct (75 ng/well), and the reporter assay performed as described in “Materials and Methods” The values shown are averages (mean  $\pm$  SE) of one representative experiment out of three in which each transfection was performed in duplicate. doi:10.1371/journal.pone.0036601.g006



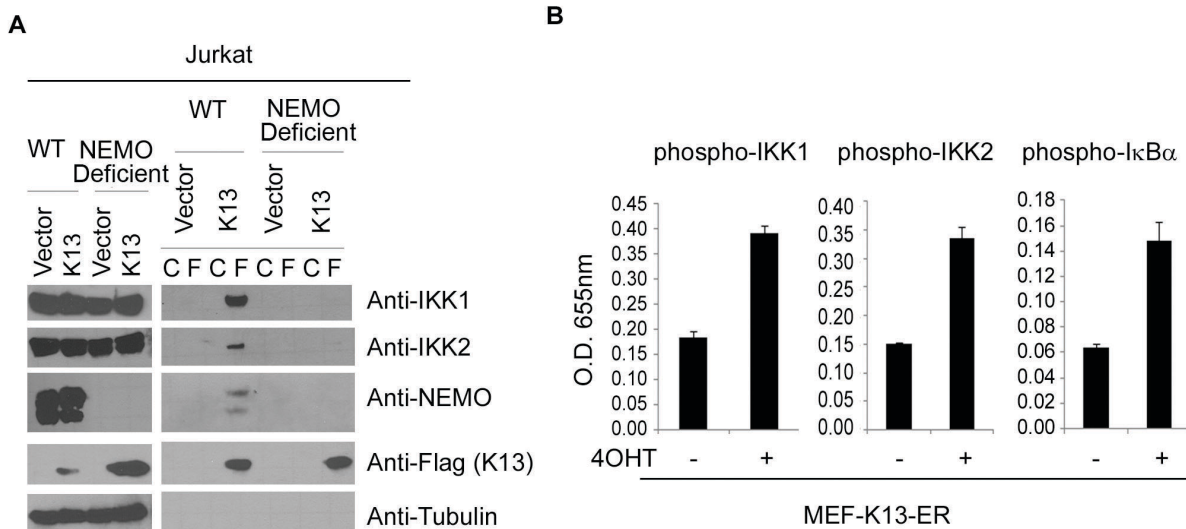

**Figure 7. NEMO-mediated recruitment of IKK1 and IKK2 to K13 and their activation by "T loop" phosphorylation.** **A.** Co-immunoprecipitation assay showing NEMO is essential for mediating the interaction of K13 with IKK1 and IKK2. FLAG-tagged K13 was immunoprecipitated from WT and NEMO-deficient Jurkat cells using control (C) and FLAG (F) antibody beads and presence of co-immunoprecipitated IKK1, IKK2 and NEMO detected by immunoblotting. **B.** MEFs expressing K13-ER<sup>TAM</sup> were treated with 4OHT and phosphorylation status of IKK1, IKK2 and I $\kappa$ B $\alpha$  was determined using Pathscan phospho-IKK1 (Ser176/180), phospho-IKK2 (Ser177/181), phospho-I $\kappa$ B $\alpha$  (Ser32) ELISA kits, respectively. doi:10.1371/journal.pone.0036601.g007

shown that NEMO is essential for K13-induced NF- $\kappa$ B activation [34,45]. However, the exact mechanism by which K13-NEMO interaction results in the activation of the IKK complex and the NF- $\kappa$ B pathway is not clear. In a recent study, we demonstrated that TRAF2, which is required for NF- $\kappa$ B activation by TNF $\alpha$ , is not required for the interaction of K13 with NEMO and for K13-induced NF- $\kappa$ B activation [39]. In this report, we have excluded the involvement of TRAF6, which has been implicated in NF- $\kappa$ B activation during signaling emanating from IL-1 and Toll like receptors [46,47], in K13-induced NF- $\kappa$ B activation. Taken collectively, these studies support the model that K13 bypasses TRAFs and directly interacts with the IKK complex to activate the NF- $\kappa$ B pathway. This model is consistent with previous studies demonstrating a direct interaction between K13 and NEMO/IKK $\gamma$  in GST-pull down and yeast two-hybrid assays [18], and the recently described crystal structure of the K13-NEMO complex [63].

We next asked the question how the interaction of K13 with NEMO results in the activation of the IKK complex and the NF- $\kappa$ B pathway. Genetic and pharmacological studies have implicated TAK1 as the upstream kinase responsible for the activation of the IKK complex during NF- $\kappa$ B activation by pro-inflammatory cytokines [7,8]. A recent study also showed that TAK1 is required for NF- $\kappa$ B activation by KSHV-encoded viral G protein coupled receptor (vGPCR) [50]. In contrast, we found no defect in K13-induced NF- $\kappa$ B DNA-binding and transcriptional activities in *TAK1*-deficient cells. The lack of involvement of TAK1 in K13-induced NF- $\kappa$ B activity was further supported by our studies with 5Z-7-oxo-zeaenol, a specific inhibitor of TAK1, which failed to block K13-induced NF- $\kappa$ B transcriptional activity.

Recent studies have implicated LUBAC-mediated linear polyubiquitination in NF- $\kappa$ B activation by pro-inflammatory cytokines [18,19,20]. Depending on their position relative to the substrate, the ubiquitin monomers in ubiquitin chains can be described as Ub<sub>distal</sub> or Ub<sub>proximal</sub> subunits [55]. A crystal structure of NEMO in complex with linear ubiquitin molecules has demonstrated that distinct residues of NEMO interact with

Ub<sub>distal</sub> and Ub<sub>proximal</sub> subunits [55]. A recent study reported that reconstitution of a NEMO-deficient clone of mouse 70Z/3 lymphoma cells, designated 1.3E2, with a murine NEMO mutant that is defective in binding to Ub<sub>distal</sub> (NEMO-F312A) resulted in restoration of K13-induced NF- $\kappa$ B activation [64]. To confirm the lack of involvement of linear polyubiquitination in K13-induced NF- $\kappa$ B activation, we took advantage of cells that are deficient in two essential components of LUBAC, an enzyme complex required for linear polyubiquitination. Our results with *HOIL-1*<sup>-/-</sup> and *epdm* MEFs, rule out the requirement of LUBAC-induced linear polyubiquitination in K13-induced NF- $\kappa$ B activation. The lack of requirement of linear polyubiquitination in K13-induced NF- $\kappa$ B activation was further supported by our results showing that CYLD, a deubiquitylating enzyme that can cleave linear ubiquitin chains, cannot block K13-induced NF- $\kappa$ B activity. Taken collectively, the above results demonstrate that linear polyubiquitination is not required for K13-induced activation of the IKK complex and the NF- $\kappa$ B pathway.

In addition to its interaction with linear ubiquitin chains, NEMO has been shown to interact with Lys63-linked ubiquitin chains [8,65] and it has been recently suggested that both types of chains cooperate for optimal activation of the NF- $\kappa$ B pathway by pro-inflammatory cytokines [66]. Interestingly, a F312A mutation in human NEMO, which corresponds to the F305A mutation in mouse NEMO tested in this study, was shown to be defective in binding to Lys63-linked ubiquitin chains [8], which suggests that K13 activates NF- $\kappa$ B independent of Lys63-linked chains as well. This hypothesis is further supported by our results showing that K13-induced NF- $\kappa$ B is not blocked by CYLD, a deubiquitylating enzyme that cleaves both linear and Lys63-linked ubiquitin chains [57,67].

Based on the lack of involvement of TRAF6, TAK1 and LUBAC in K13-induced NF- $\kappa$ B activation, we support a model according to which the interaction between K13 and NEMO is direct and is not mediated via the TRAF family members or the linear ubiquitin chains. We further demonstrate that binding of K13 to NEMO is required for recruitment of IKK1 and IKK2 to

K13. Taken collectively, the above results support the model according to which binding of K13 to NEMO manipulates the latter into an open conformation that facilitates the recruitment of IKK1 and IKK2 and their subsequent activation by “T loop” phosphorylation.

Specific inhibitors of IKK (particularly IKK2) that can selectively block NF- $\kappa$ B pathway are being developed by several pharmaceutical companies [68]. However, since the NF- $\kappa$ B pathway plays a key role in normal immune response [69], the clinical utility of such agents in KSHV-associated lymphoproliferative disorders is likely to be limited by their potential toxicity. For example, *in vivo* administration of ML120B, a small molecule selective inhibitor of IKK2, led to rapid depletion of T and B cells [70]. Although no IKK1-selective inhibitor has been described to date, genetic studies suggest that IKK1 may similarly play an essential role in lymphocyte development and function [71]. As patients with KSHV-associated malignancies are usually immunosuppressed, the deleterious effect of IKK inhibitors on lymphocyte number and function is of potential concern. Therefore, we believe that rather than blocking NF- $\kappa$ B pathway

globally, the ideal agent for the treatment of KSHV-associated lymphoproliferative disorders should selectively block K13-induced NF- $\kappa$ B activation. Our results showing that K13 activates the NF- $\kappa$ B pathway via a mechanism distinct from that utilized by immune and inflammatory cytokines suggest that it may be possible to design such an agent that will selectively block K13-induced NF- $\kappa$ B while sparing the physiological activation of this pathway required for normal lymphocyte development, survival and function.

## Acknowledgments

The authors thank Drs. Mak, Watowich, Iwai and Dikic for cell lines and reagents.

## Author Contributions

Conceived and designed the experiments: PMC HM CG RG. Performed the experiments: HY YS BT AK. Analyzed the data: HM CG RG AK PMC. Contributed reagents/materials/analysis tools: PMC HM. Wrote the paper: PMC HM.

## References

- Gupta SC, Sundaram C, Reuter S, Aggarwal BB (2010) Inhibiting NF-kappaB activation by small molecules as a therapeutic strategy. *Biochim Biophys Acta* 1799: 775–787.
- Aggarwal BB (2004) Nuclear factor-kappaB: the enemy within. *Cancer Cell* 6: 203–208.
- Richmond A (2002) NF-kappa B, chemokine gene transcription and tumour growth. *Nat Rev Immunol* 2: 664–674.
- Hayden MS, Ghosh S (2004) Signaling to NF-kappaB. *Genes Dev* 18: 2195–2224.
- Karin M, Delhase M (2000) The I kappa B kinase (IKK) and NF-kappa B: key elements of proinflammatory signalling. *Semin Immunol* 12: 85–98.
- Bonizzi G, Bebbien M, Otero DC, Johnson-Vroom KE, Cao Y, et al. (2004) Activation of IKKalpha target genes depends on recognition of specific kappaB binding sites by RelB:p52 dimers. *Embo J* 23: 4202–4210.
- Kanayama A, Seth RB, Sun L, Ea CK, Hong M, et al. (2004) TAB2 and TAB3 activate the NF-kappaB pathway through binding to polyubiquitin chains. *Mol Cell* 15: 535–548.
- Ea CK, Deng L, Xia ZP, Pineda G, Chen ZJ (2006) Activation of IKK by TNFalpha requires site-specific ubiquitination of RIP1 and polyubiquitin binding by NEMO. *Mol Cell* 22: 245–257.
- Wajant H, Pfizenmaier K, Scheurich P (2003) Tumor necrosis factor signaling. *Cell Death Differ* 10: 45–65.
- Aggarwal BB, Takada Y (2005) Pro-apoptotic and anti-apoptotic effects of tumor necrosis factor in tumor cells. Role of nuclear transcription factor NF-kappaB. *Cancer Treat Res* 126: 103–127.
- Hsu H, Huang J, Shu HB, Baichwal V, Goeddel DV (1996a) TNF-dependent recruitment of the protein kinase RIP to the TNF receptor-1 signaling complex. *Immunity* 4: 387–396.
- Hsu H, Shu HB, Pan MG, Goeddel DV (1996b) TRADD-TRAF2 and TRADD-FADD interactions define two distinct TNF receptor 1 signal transduction pathways. *Cell* 84: 299–308.
- Hsu H, Xiong J, Goeddel DV (1995) The TNF receptor 1-associated protein TRADD signals cell death and NF-kappa B activation. *Cell* 81: 495–504.
- Shu HB, Takeuchi M, Goeddel DV (1996) The tumor necrosis factor receptor 2 signal transducers TRAF2 and c-IAP1 are components of the tumor necrosis factor receptor 1 signaling complex. *Proc Natl Acad Sci U S A* 93: 13973–13978.
- Varfolomeev E, Blankenship JW, Wayson SM, Fedorova AV, Kayagaki N, et al. (2007) IAP antagonists induce autoubiquitination of c-IAPs, NF-kappaB activation, and TNFalpha-dependent apoptosis. *Cell* 131: 669–681.
- Varfolomeev E, Goncharov T, Fedorova AV, Dzynek JN, Zobel K, et al. (2008) c-IAP1 and c-IAP2 are critical mediators of tumor necrosis factor alpha (TNFalpha)-induced NF-kappaB activation. *J Biol Chem* 283: 24295–24299.
- Li H, Kobayashi M, Blonska M, You Y, Lin X (2006) Ubiquitination of RIP is required for tumor necrosis factor alpha-induced NF-kappaB activation. *J Biol Chem* 281: 13636–13643.
- Tokunaga F, Sakata S, Saeki Y, Satomi Y, Kirisako T, et al. (2009) Involvement of linear polyubiquitylation of NEMO in NF-kappaB activation. *Nat Cell Biol* 11: 123–132.
- Emmerich CH, Schmukle AC, Haas TL, Gerlach B, Cordier SM, et al. (2011) The linear ubiquitin chain assembly complex forms part of the TNF-R1 signalling complex and is required for effective TNF-induced gene induction and prevents TNF-induced apoptosis. *Adv Exp Med Biol* 691: 115–126.
- Haas TL, Emmerich CH, Gerlach B, Schmukle AC, Cordier SM, et al. (2009) Recruitment of the linear ubiquitin chain assembly complex stabilizes the TNF-R1 signaling complex and is required for TNF-mediated gene induction. *Mol Cell* 36: 831–844.
- Ikeda F, Deribe YL, Skanland SS, Stieglitz B, Grabbe C, et al. (2011) SHARPIN forms a linear ubiquitin ligase complex regulating NF-kappaB activity and apoptosis. *Nature* 471: 637–641.
- Casanova JL, Abel L, Quintana-Murci L (2011) Human TLRs and IL-1Rs in host defense: natural insights from evolutionary, epidemiological, and clinical genetics. *Annu Rev Immunol* 29: 447–491.
- Medzhitov R, Hornig T (2009) Transcriptional control of the inflammatory response. *Nat Rev Immunol* 9: 692–703.
- Lomaga MA, Yeh WC, Sarosi I, Duncan GS, Furlonger C, et al. (1999) TRAF6 deficiency results in osteoporosis and defective interleukin-1, CD40, and LPS signaling. *Genes Dev* 13: 1015–1024.
- Kawai T, Adachi O, Ogawa T, Takeda K, Akira S (1999) Unresponsiveness of MyD88-deficient mice to endotoxin. *Immunity* 11: 115–122.
- Deng L, Wang C, Spencer E, Yang L, Braun A, et al. (2000) Activation of the IkappaB kinase complex by TRAF6 requires a dimeric ubiquitin-conjugating enzyme complex and a unique polyubiquitin chain. *Cell* 103: 351–361.
- Conze DB, Wu CJ, Thomas JA, Landstrom A, Ashwell JD (2008) Lys63-linked polyubiquitination of IRAK-1 is required for interleukin-1 receptor- and toll-like receptor-mediated NF-kappaB activation. *Mol Cell Biol* 28: 3538–3547.
- Agou F, Ye F, Goffinot S, Courtois G, Yamaoka S, et al. (2002) NEMO trimerizes through its coiled-coil C-terminal domain. *J Biol Chem* 277: 17464–17475.
- Morris K (2003) Cancer? In Africa? *Lancet Oncol* 4: 5.
- Wabinga HR, Parkin DM, Wabwire-Mangen F, Mugerwa JW (1993) Cancer in Kampala, Uganda, in 1989–91: changes in incidence in the era of AIDS. *Int J Cancer* 54: 26–36.
- Moore PS, Chang Y (2001) Molecular virology of Kaposi's sarcoma-associated herpesvirus. *Philos Trans R Soc Lond B Biol Sci* 356: 499–516.
- Sturzl M, Hohenadl C, Zietz C, Castanos-Velez E, Wunderlich A, et al. (1999) Expression of K13/v-FLIP gene of human herpesvirus 8 and apoptosis in Kaposi's sarcoma spindle cells. *J Natl Cancer Inst* 91: 1725–1733.
- Thome M, Schneider P, Hofmann K, Fickenscher H, Meil E, et al. (1997) Viral FLICE-inhibitory proteins (FLIPs) prevent apoptosis induced by death receptors. *Nature* 386: 517–521.
- Liu L, Eby MT, Rathore N, Sinha SK, Kumar A, et al. (2002) The Human Herpes Virus 8-encoded Viral FLICE Inhibitory Protein Physically Associates with and Persistently Activates the Ikappa B Kinase Complex. *J Biol Chem* 277: 13745–13751.
- Chugh P, Matta H, Schamus S, Zachariah S, Kumar A, et al. (2005) Constitutive NF-kappaB activation, normal Fas-induced apoptosis, and increased incidence of lymphoma in human herpes virus 8 K13 transgenic mice. *Proc Natl Acad Sci U S A* 102: 12885–12890.
- Sun Q, Zachariah S, Chaudhary PM (2003) The human herpes virus 8-encoded viral FLICE-inhibitory protein induces cellular transformation via NF-kappaB activation. *Journal of Biological Chemistry* 278: 52437–52445.
- Sun Q, Matta H, Lu G, Chaudhary PM (2006) Induction of IL-8 expression by human herpesvirus 8 encoded vFLIP K13 via NF-kappaB activation. *Oncogene* 25: 2717–2726.
- Guasparri I, Keller SA, Cesarman E (2004) KSHV vFLIP is essential for the survival of infected lymphoma cells. *J Exp Med* 199: 993–1003.

39. Matta H, Mazzacurati L, Schamus S, Yang T, Sun Q, et al. (2007) Kaposi's Sarcoma-associated Herpesvirus (KSHV) Oncoprotein K13 Bypasses TRAFs and Directly Interacts with the I $\kappa$ B Kinase Complex to Selectively Activate NF- $\kappa$ B without JNK Activation. *J Biol Chem* 282: 24858–24865.
40. Zhao J, Punj V, Matta H, Mazzacurati L, Schamus S, et al. (2007) K13 Blocks KSHV Lytic Replication and Deregulates vIL6 and hIL6 Expression: a Model of Lytic Replication Induced Clonal Selection in Viral Oncogenesis. *PLoS ONE* 2: e1067.
41. Matta H, Punj V, Schamus S, Mazzacurati L, Chen AM, et al. (2008) A nuclear role for Kaposi's sarcoma-associated herpesvirus-encoded K13 protein in gene regulation. *Oncogene* 27: 5243–5253.
42. Chaudhary PM, Jasmin A, Eby MT, Hood L (1999) Modulation of the NF- $\kappa$ B pathway by virally encoded death effector domains-containing proteins. *Oncogene* 18: 5738–5746.
43. Kumar A, Eby MT, Sinha S, Jasmin A, Chaudhary PM (2001) Ectodermal dysplasia receptor activates the nuclear factor kappa B, c-Jun N-terminal kinase and cell death pathways and binds to ectodysplasin A. *J Biol Chem* 276: 2668–2677.
44. Matta H, Chaudhary PM (2004) Activation of alternative NF- $\kappa$ B pathway by human herpes virus 8-encoded Fas-associated death domain-like IL-1 beta-converting enzyme inhibitory protein (vFLIP). *Proc Natl Acad Sci U S A* 101: 9399–9404.
45. Matta H, Sun Q, Moses G, Chaudhary PM (2003) Molecular genetic analysis of human herpes virus 8-encoded viral FLICE inhibitory protein-induced NF- $\kappa$ B activation. *Journal of Biological Chemistry* 278: 52406–52411.
46. Chen ZJ (2005) Ubiquitin signalling in the NF- $\kappa$ B pathway. *Nat Cell Biol* 7: 758–765.
47. Muzio M, Natoli G, Sacconi S, Levrero M, Mantovani A (1998) The human toll signaling pathway: divergence of nuclear factor kappa B and JNK/SAPK activation upstream of tumor necrosis factor receptor-associated factor 6 (TRAF6). *J Exp Med* 187: 2097–2101.
48. Matta H, Surabhi RM, Zhao J, Punj V, Sun Q, et al. (2007) Induction of spindle cell morphology in human vascular endothelial cells by human herpesvirus 8-encoded viral FLICE inhibitory protein K13. *Oncogene* 26: 1656–1660.
49. Matta H, Gopalakrishnan R, Punj V, Yi H, Suo Y, et al. (2011) A20 is induced by Kaposi sarcoma-associated herpesvirus-encoded viral FLICE inhibitory protein (vFLIP) K13 and blocks K13-induced nuclear factor-kappaB in a negative feedback manner. *J Biol Chem* 286: 21555–21564.
50. Bottero V, Kerur N, Sadagopan S, Patel K, Sharma-Walia N, et al. (2011) Phosphorylation and polyubiquitination of transforming growth factor beta-activated kinase 1 are necessary for activation of NF- $\kappa$ B by the Kaposi's sarcoma-associated herpesvirus G protein-coupled receptor. *J Virol* 85: 1980–1993.
51. Shembade N, Ma A, Harhaj EW (2010) Inhibition of NF- $\kappa$ B signaling by A20 through disruption of ubiquitin enzyme complexes. *Science* 327: 1135–1139.
52. Suzuki S, Singhirunnosorn P, Mori A, Yamaoka S, Kitajima I, et al. (2007) Constitutive activation of TAK1 by HTLV-1 tax-dependent overexpression of TAB2 induces activation of JNK-ATF2 but not IKK-NF- $\kappa$ B. *J Biol Chem* 282: 25177–25181.
53. Ninomiya-Tsuji J, Kajino T, Ono K, Ohtomo T, Matsumoto M, et al. (2003) A resorcylic acid lactone, 5Z-7-oxozeaenol, prevents inflammation by inhibiting the catalytic activity of TAK1 MAPK kinase. *J Biol Chem* 278: 18485–18490.
54. Seymour RE, Hasham MG, Cox GA, Shultz LD, Hogenesch H, et al. (2007) Spontaneous mutations in the mouse Sharpin gene result in multiorgan inflammation, immune system dysregulation and dermatitis. *Genes Immun* 8: 416–421.
55. Rahighi S, Ikeda F, Kawasaki M, Akutsu M, Suzuki N, et al. (2009) Specific recognition of linear ubiquitin chains by NEMO is important for NF- $\kappa$ B activation. *Cell* 136: 1098–1109.
56. Brummelkamp TR, Nijman SM, Dirac AM, Bernards R (2003) Loss of the cylindromatosis tumour suppressor inhibits apoptosis by activating NF- $\kappa$ B. *Nature* 424: 797–801.
57. Niu J, Shi Y, Iwai K, Wu ZH (2011) LUBAC regulates NF- $\kappa$ B activation upon genotoxic stress by promoting linear ubiquitination of NEMO. *Embo J* 30: 3741–3753.
58. Tokunaga F, Nakagawa T, Nakahara M, Saeki Y, Taniguchi M, et al. (2011) SHARPIN is a component of the NF- $\kappa$ B-activating linear ubiquitin chain assembly complex. *Nature* 471: 633–636.
59. Trompouki E, Hatzivassiliou E, Tschirritzis T, Farmer H, Ashworth A, et al. (2003) CYLD is a deubiquitinating enzyme that negatively regulates NF- $\kappa$ B activation by TNFR family members. *Nature* 424: 793–796.
60. Field N, Low W, Daniels M, Howell S, Daviet L, et al. (2003) KSHV vFLIP binds to IKK- $\gamma$  to activate IKK. *J Cell Sci* 116: 3721–3728.
61. Delhase M, Hayakawa M, Chen Y, Karin M (1999) Positive and negative regulation of I $\kappa$ B kinase activity through IKK $\beta$  subunit phosphorylation. *Science* 284: 309–313.
62. O'Mahony A, Lin X, Gelezianus R, Greene WC (2000) Activation of the heterodimeric I $\kappa$ B kinase alpha (IKK $\alpha$ )-IKK $\beta$  complex is directional: IKK $\alpha$  regulates IKK $\beta$  under both basal and stimulated conditions. *Mol Cell Biol* 20: 1170–1178.
63. Bagneris C, Agechik AV, Cronin N, Wallace B, Collins M, et al. (2008) Crystal structure of a vFlip-IKK $\gamma$  complex: insights into viral activation of the IKK signalosome. *Mol Cell* 30: 620–631.
64. Shimizu A, Baratchian M, Takeuchi Y, Escors D, Macdonald D, et al. (2011) Kaposi's sarcoma-associated herpesvirus vFLIP and human T cell lymphotropic virus type 1 Tax oncogenic proteins activate I $\kappa$ B kinase subunit gamma by different mechanisms independent of the physiological cytokine-induced pathways. *J Virol* 85: 7444–7448.
65. Wu CJ, Conze DB, Li T, Srinivasula SM, Ashwell JD (2006) Sensing of Lys 63-linked polyubiquitination by NEMO is a key event in NF- $\kappa$ B activation [corrected]. *Nat Cell Biol* 8: 398–406.
66. Hadian K, Griesbach RA, Dornauer S, Wanger TM, Nagel D, et al. (2011) NF- $\kappa$ B essential modulator (NEMO) interaction with linear and lys-63 ubiquitin chains contributes to NF- $\kappa$ B activation. *J Biol Chem* 286: 26107–26117.
67. Komander D, Reyes-Turcu F, Licchesi JD, Odenwaelder P, Wilkinson KD, et al. (2009) Molecular discrimination of structurally equivalent Lys 63-linked and linear polyubiquitin chains. *EMBO Rep* 10: 466–473.
68. Karin M, Yamamoto Y, Wang QM (2004) The IKK NF- $\kappa$ B system: a treasure trove for drug development. *Nat Rev Drug Discov* 3: 17–26.
69. Pasparakis M, Schmidt-Supprian M, Rajewsky K (2002) I $\kappa$ B kinase signaling is essential for maintenance of mature B cells. *J Exp Med* 196: 743–752.
70. Nagashima K, Sasseville VG, Wen D, Bielecki A, Yang H, et al. (2006) Rapid TNFR1-dependent lymphocyte depletion in vivo with a selective chemical inhibitor of IKK $\beta$ . *Blood* 107: 4266–4273.
71. Ren H, Schmalstieg A, van Oers NS, Gaynor RB (2002) I- $\kappa$ B kinases alpha and beta have distinct roles in regulating murine T cell function. *Journal of Immunology* 168: 3721–3731.
